# Supplementary material
Source: publisher site journal article supplement (https://www.dovepress.com/article/619318)
Supplement: Supplementary file 1 [file 619318%20Supplementary%20File.docx]

| Database | Search Strings |
| --- | --- |
| PubMed | ("Artificial Intelligence"[Mesh] OR "Machine Learning"[Mesh] OR "Artificial Intelligence"[tiab] OR "Machine Learning"[tiab] OR "Deep Learning"[tiab] OR "Computer Vision"[tiab] OR "AI"[tiab]) AND ("Nursing"[Mesh] OR "Nurses"[Mesh] OR "nurs*"[tiab] OR "nursing workflow"[tiab] OR "nursing process"[tiab]) AND ("Wounds and Injuries"[Mesh] OR "wound care"[tiab] OR "wound management"[tiab] OR "wound assessment"[tiab] OR "chronic wound*"[tiab] OR "pressure ulcer*"[tiab]) AND (2021:2026[pdat]) |
| Scopus | TITLE-ABS-KEY ( ( "Artificial Intelligence" OR "Machine Learning" OR "Deep Learning" OR "Computer Vision" OR "AI" ) AND ( "nurs*" OR "nursing workflow" OR "nursing process" ) AND ( "wound care" OR "wound assessment" OR "wound management" OR "chronic wound*" OR "pressure ulcer*" ) ) AND PUBYEAR > 2020 AND ( LIMIT-TO ( DOCTYPE , "ar" ) ) AND ( LIMIT-TO ( SRCTYPE , "j" ) ) |
| ScienceDirect | ("Artificial Intelligence" OR "Machine Learning" OR "Computer Vision" OR "AI") AND ("nursing" OR "nurse" OR "nurses") AND ("wound care" OR "wound assessment" OR "wound management" OR "chronic wound" OR "pressure ulcer") |

**Supplementary File 1**

The asterisk (*) indicates a truncation (wildcard) symbol used in the search syntax to retrieve all suffix variations of the specified root word.
